# Supplementary material
Source: publisher figshare collection journal article supplement (https://acs.figshare.com/ndownloader/files/3908422)
Supplement: Supplementary file 1 [file 3908422]

## Supporting Information

# Luminescent Calix[4]arene-Based Metallogel Formed at Different Solvent Composition

*Jaehyeon Park,<sup>†</sup> Ji Ha Lee,<sup>†</sup> Justyn Jaworski,<sup>‡</sup> Seiji Shinkai,<sup>//</sup> and Jong Hwa Jung<sup>\*,†</sup>*

<sup>†</sup>Department of Chemistry & Research Institute of Natural Science, Gyeongsang National University, Jinju 660-701, Republic of Korea. <sup>‡</sup>Dept. of Chemical Engineering, Hanyang University, Seoul, Korea. <sup>//</sup> Institute for Advanced Study, Kyushu University Fukuoka 819-0395, Japan.

**Table S1.** Gelation Test of Ligand **1** (1.0 wt%) with Pt<sup>2+</sup> (4 equivalents) in Different Solvents

| DMSO/X (1:1 v/v)   | Phase |
|--------------------|-------|
| Chloroform         | P     |
| Methylene chloride | P     |
| Toluene            | P     |
| Methanol           | P     |
| Ethanol            | P     |
| Ethyl acetate      | P     |
| Acetonitrile       | P     |
| Tetrahydrofuran    | P     |
| Acetone            | P     |
| H <sub>2</sub> O   | G     |

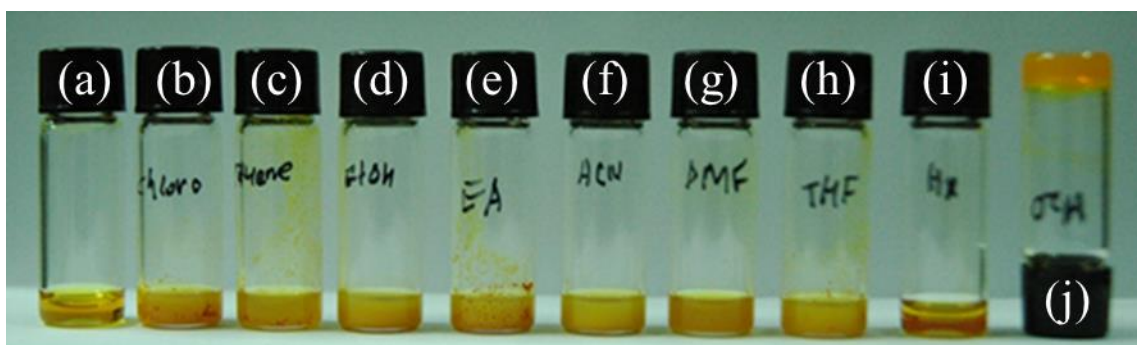

**Figure S1.** Photographs of ligand **1** (1.0 wt%) with  $\text{Pt}^{2+}$  (4 equivalents) in different solvents (a) DMSO, (b) Chloroform, (c) Toluene, (d) Ethanol, (e) Ethyl acetate, (f) Acetonitrile, (g) DMF, (h) THF, (i) Hexane, and (j)  $\text{H}_2\text{O}$ .

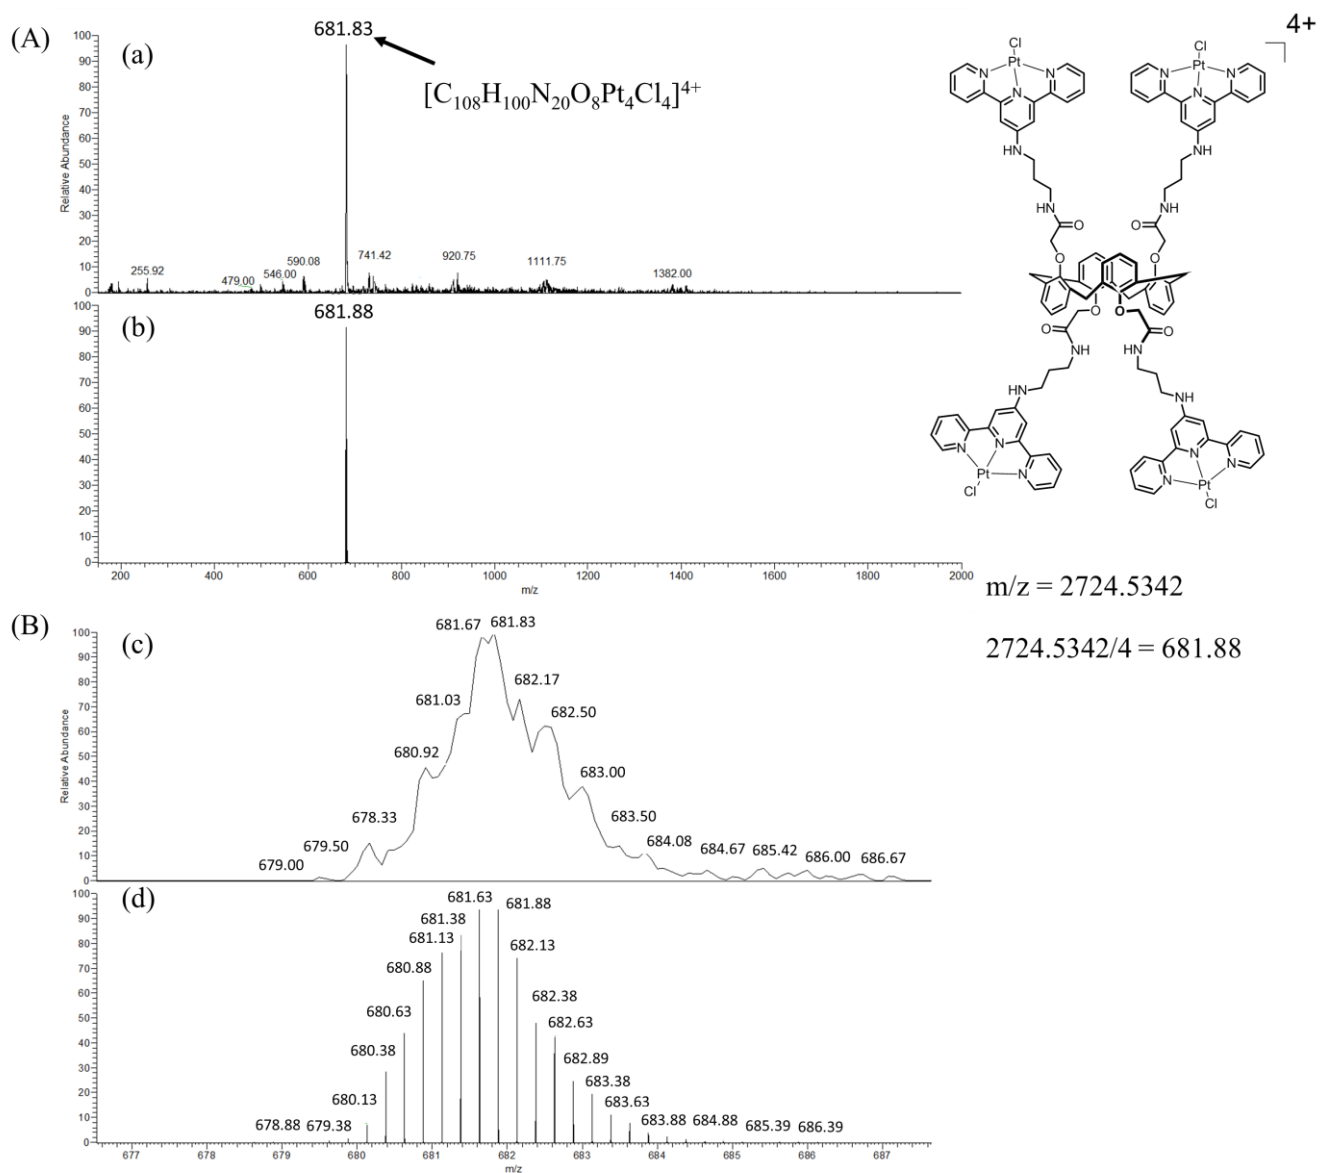

**Figure S2.** ESI Mass spectra of gel **1**- $[PtCl_2]_4^{4+}$ ; (a and c) experimental and (b and d) calculated data.

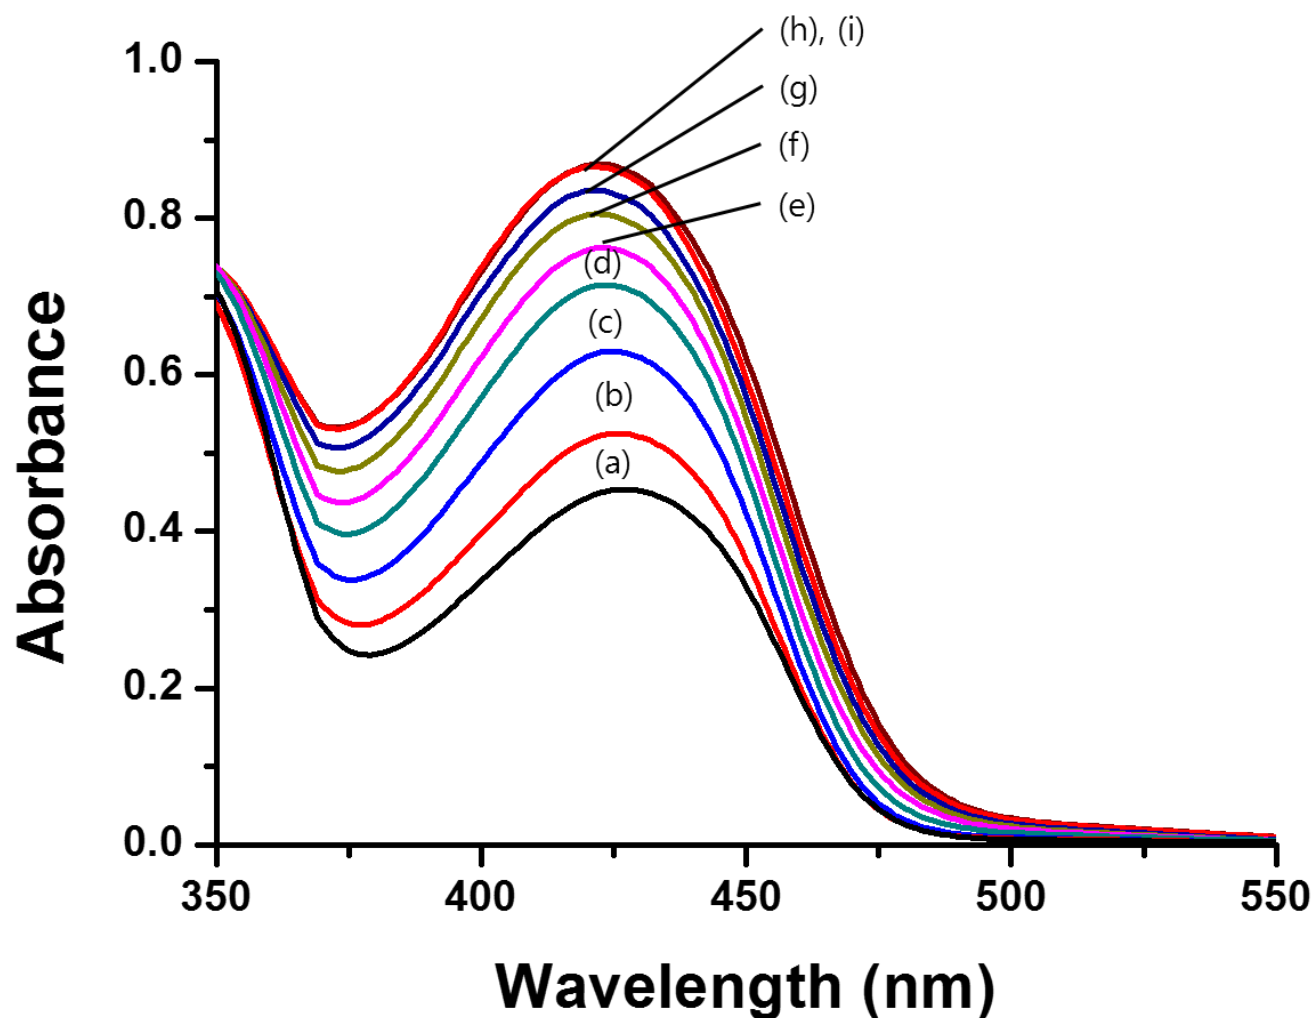

**Figure S3.** UV/Vis absorption spectra of metallogel **1** with  $\text{Pt}^{2+}$  at different solvent composition of  $\text{H}_2\text{O}$ :DMSO (a) 1:9, (b) 2:8, (c) 3:7, (d) 4:6, (e) 5:5, (f) 6:4, (g) 7:3, (h) 8:2, and (i) 9:1 at concentration =  $5 \times 10^{-4}$  M.

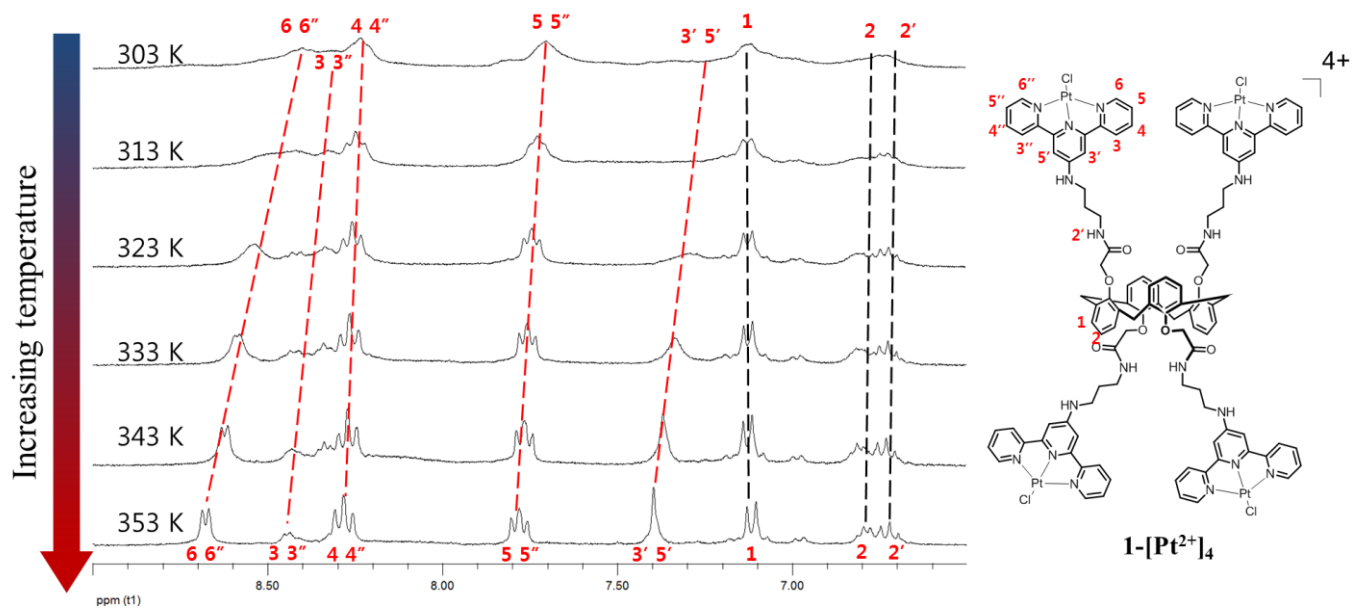

**Figure S4.**  $^1\text{H}$  NMR spectra of metallogel **1** with  $\text{Pt}^{2+}$  (4.0 equivalents) by changing the temperature.

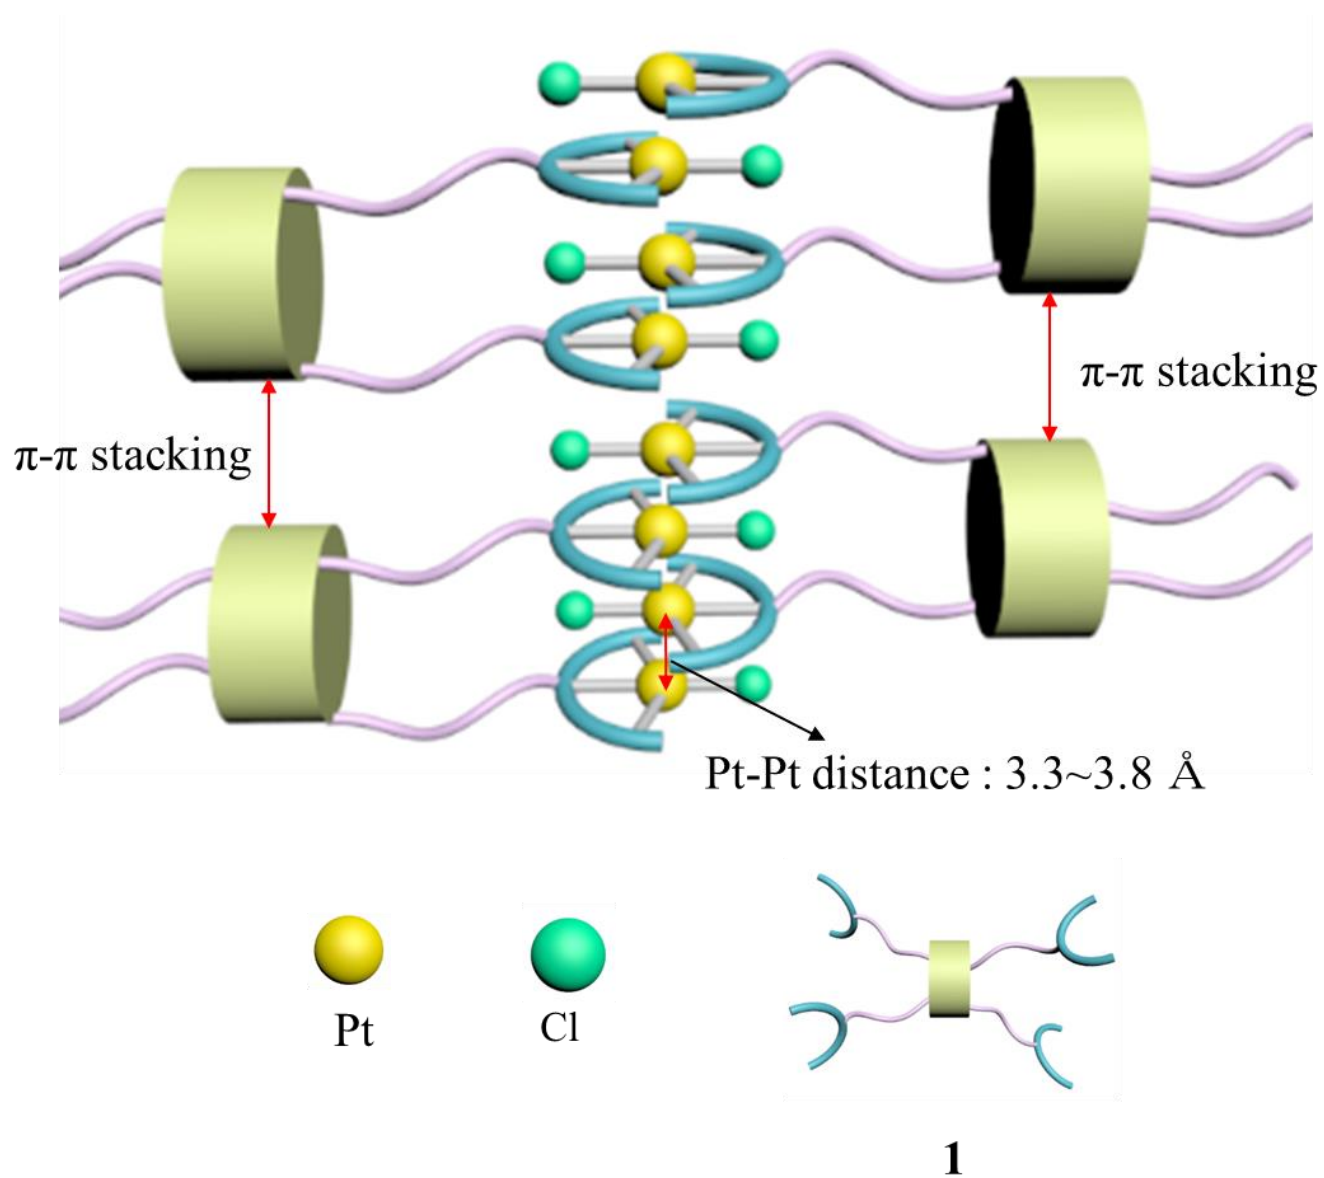

**Figure S5.** Proposed structure of metallogel **1** with  $\text{Pt}^{2+}$  (4.0 equivalents).

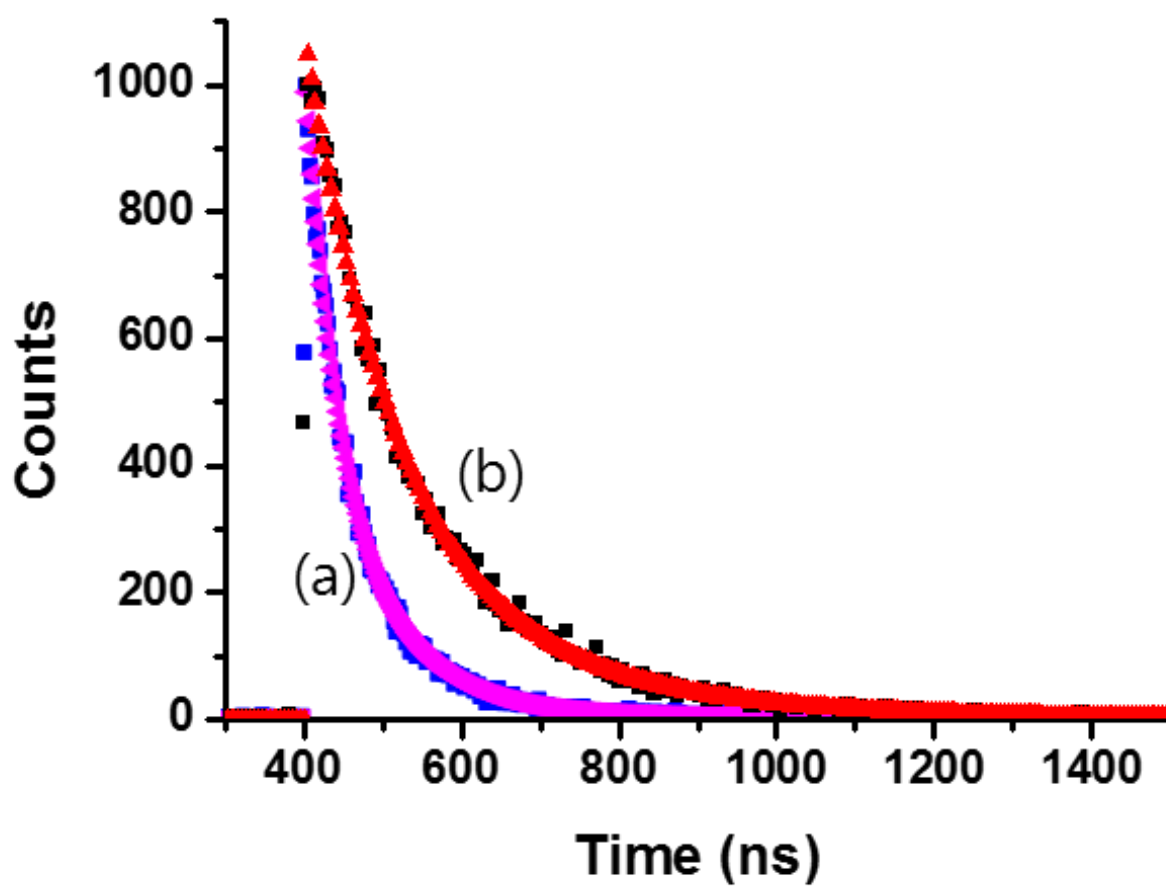

**Figure S6.** Emission decay curves of gel **1**-[PtCl]<sub>4</sub><sup>4+</sup> with different contents of H<sub>2</sub>O/DMSO (a) 7:3, and (b) 3:7.



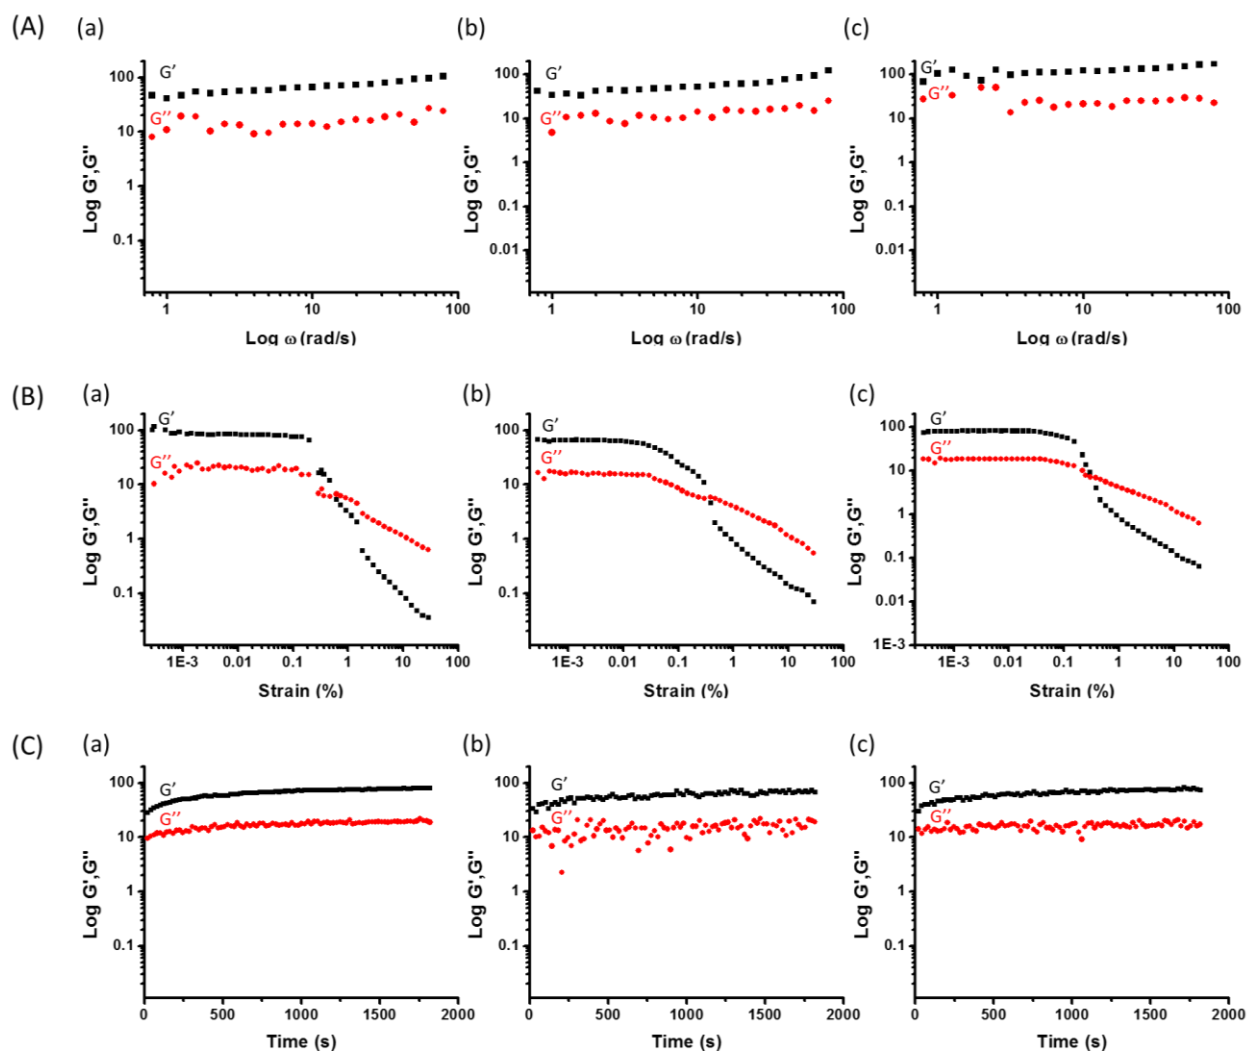

**Figure S7.** Dynamic oscillatory and steady shear measurements of Pt<sup>2+</sup> metallogel **1** at different equivalents of Pt<sup>2+</sup>: (A) Frequency sweep of G' and G'' for Pt<sup>2+</sup> metallogel **1** (a) 4.0 equiv, (b) 5.0 equiv, and (c) 6.0 equiv at a strain of 0.1 %. (B) Strain sweep G' and G'' at a frequency of 1 rad s<sup>-1</sup> for Pt<sup>2+</sup> metallogel **1** (a) 4.0 equiv, (b) 5.0 equiv, and (c) 6.0equiv. (C) time-dependent oscillation measurements of G' and G'' for Pt<sup>2+</sup> metallogel **1** (a) 4.0 equiv, (b) 5.0 equiv, and (c) 6.0 equiv at a strain of 0.1 %.
